# Supplementary material
Source: PubMed Central journal article supplement (PMC2672812)
Supplement: mol.108.054486_1.pdf [file mol.108.054486_1.pdf]

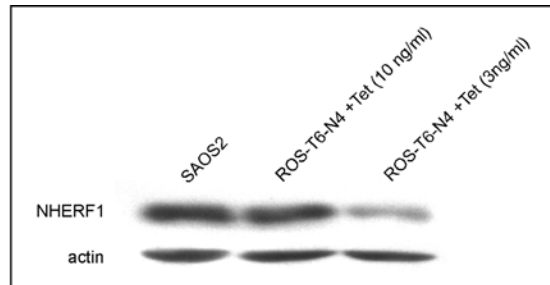

Supplementary Figure 1

Supplemental Fig. 1. Comparison of Tet-induced NHERF1 expression in ROS-T6-N4 cells with endogenous NHERF1 levels in SAOS2 cells. ROS-T6-N4 cells or SAOS2 cells were seeded on 6-well plates. ROS-T6-N4 cells were treated with 3 or 10 ng/ml Tet. After 48h, the cells were lysed. Twenty  $\mu$ g of protein of whole-cell lysates of ROS-T6-N4 cells or SAOS2 cells were loaded to per lane. NHERF1 expression was detected by immunoblot analysis using actin as an internal loading control. A representative immunoblot shows that Tet (10 ng/ml)-induced similar NHERF1 expression as constitutively expressed by SAOS2 cells.
